# Supplementary material for: Coccydynia Exacerbates Quality of Life, Functional, and Neuromuscular Dysfunction in Third Trimester Pregnancy-Related Pelvic Girdle Pain: A Cross-Sectional Study
Source: Research Square preprint supplement (doi:10.21203/rs.3.rs-7313021/v1), 2025-08-27
Supplement: Supplementary file 1 [file 772764a52176e7dfaef375bf.xlsx]

## Sheet: koksidini_veri_seti.son
Hasta_no	Grup	yaş	boy	kilo	BMI	gebelik_haftası	sigara_paket_yıl	sigara_kullanımı	IPAQ_şiddetli	IPAQ_orta	IPAQ_yürüme	IPAQ_oturma	IPAQ_Toplam	PGQ	VAS_oturma	WHOQOL_fiziksel	WHOQOL_Psikolojik	WHOQOL_sosyal	WHOQOL_Çevre	Oswestry	Pittsburg	Normalized_work_EMG_yüzde	Normalized_rest_EMG_yüzde
1	1	33.97	172.75	76.49	25.6	33.64	0	0	2880	0	198	4	3082	65.27	9.31	18	50	91	78	84	1	37	10
2	1	28.89	179.27	67.45	21	29.26	#NULL!	0	0	1680	1386	3	3069	33.68	6.23	25	67	58	38	54	10	43	9
3	1	35.18	162.14	51.74	19.7	33.52	#NULL!	0	0	784	594	4	1382	52.1	6.63	50	83	83	66	22	12	30	10
4	1	42.18	175.04	76.03	24.8	34.16	15	2	0	120	396	3	519	57.39	5.4	57	54	100	75	38	20	36	9
5	1	28.13	167.34	59.07	21.1	30.35	5	2	0	0	1386	4	1390	30.17	4.27	89	42	50	41	12	17	26	11
6	1	28.13	155.26	82.1	34.1	33.46	#NULL!	0	3360	0	1386	5	4751	44.05	4.55	71	50	83	84	44	11	53	11
7	1	42.63	167.34	61.21	21.9	33.17	5	1	0	80	1386	4	1470	7	6.91	36	58	33	78	14	2	38	4
8	1	36.14	181.46	98.25	29.8	29.57	#NULL!	0	360	3600	2772	4	6736	28.61	7.48	18	71	91	3	54	2	32	7
9	1	26.24	162.57	63.25	23.9	34.07	#NULL!	0	0	0	693	5	698	40.96	7.79	57	50	100	97	50	0	27	10
10	1	34.34	181.78	70.17	21.2	34.68	#NULL!	0	0	0	1386	5	1391	25.04	7.77	18	88	91	78	64	20	42	3
11	1	26.29	131.56	87.2	50.4	36.25	#NULL!	0	0	0	1386	4	1390	71.12	2.22	36	54	83	50	20	1	33	6
12	1	26.27	172.86	56.54	18.9	36.16	#NULL!	0	480	480	924	5	1889	22.12	5.7	43	75	83	91	16	6	46	9
13	1	31.94	164.04	78.41	29.1	28.87	#NULL!	0	0	0	1386	5	1391	37.96	1.65	36	21	50	91	60	1	34	10
14	1	25	159.41	94.61	37.2	30.19	3	2	0	32	132	5	169	47.09	6.07	29	38	83	75	34	6	36	13
15	1	26	164.1	50.89	18.9	34.55	#NULL!	0	0	0	1386	6	1392	68.06	5.35	39	83	91	50	22	13	27	3
16	1	25.5	159	77.77	30.9	34.54	#NULL!	0	0	0	1386	5	1391	22.03	8.63	32	46	75	41	52	8	44	10
17	1	21.9	160.36	78.9	30.7	34.55	5	1	0	0	132	4	136	63.61	4.71	21	83	75	41	88	4	42	9
18	1	32.51	167.29	86.73	31	44.56	#NULL!	0	0	0	2772	4	2776	45.16	2.57	54	33	100	88	40	18	25	8
19	1	22.74	180.73	56.45	17.3	34.71	3	2	0	0	1039	4	1043	29.3	2.88	36	33	16	53	28	3	26	2
20	1	29	156.78	55.19	22.5	36.41	#NULL!	0	0	0	1386	6	1392	52.39	7.55	61	38	75	88	24	2	30	9
21	1	41.73	153.3	82.83	35.2	35.86	#NULL!	0	0	0	1386	5	1391	48.18	6.53	43	38	16	84	22	17	36	8
22	1	28.19	156.98	79.45	32.2	34.95	#NULL!	0	0	1680	1386	5	3071	35.4	2.36	71	46	50	66	68	8	31	12
23	1	30.54	173.98	78.76	26	32.05	#NULL!	0	0	784	594	5	1383	46.12	2.11	57	79	58	78	42	7	28	7
24	1	29	166.95	80.2	28.8	35.28	#NULL!	0	0	0	693	5	698	38.83	7.11	46	29	75	66	22	2	26	9
25	1	25.64	156.64	64.8	26.4	30.68	#NULL!	0	0	0	1386	5	1391	46.82	1.93	82	58	91	53	28	9	31	4
26	1	30.89	169.16	78.48	27.4	32.29	#NULL!	0	3360	0	1386	6	4752	55.59	8.03	29	25	50	50	50	3	30	8
27	1	20.79	164.16	79.4	29.5	31.54	5	1	0	480	792	5	1277	70.38	7.14	71	63	66	72	74	1	30	10
28	1	33.01	174.62	64.28	21.1	33.25	#NULL!	0	0	320	0	4	324	25.19	2.07	32	71	83	75	22	14	29	13
29	1	25.19	154.58	76	31.8	39.94	#NULL!	0	0	240	396	4	640	79.13	2.12	39	38	100	75	38	21	50	12
30	1	27.67	159.07	82.11	32.5	27.4	#NULL!	0	0	0	594	5	599	13.77	9.79	57	58	25	38	34	0	52	6
31	1	25.19	158.29	57.13	22.8	35.06	4	2	0	240	594	4	838	42.57	4.88	7	88	83	94	54	3	27	10
32	1	44.82	145.44	84.85	35.3	28.16	4	1	0	0	396	4	400	54.41	4.85	25	21	50	97	24	14	40	3
33	2	29.89	166.55	60.38	21.8	31.58	9	2	30240	0	11088	5	41333	35.37	#NULL!	14	58	50	50	16	5	43	7
34	2	21.54	166.13	86.81	31.5	36.27	#NULL!	0	0	1440	2772	4	4216	24.53	#NULL!	39	67	100	100	42	8	29	6
35	2	36.58	163.06	92.38	34.7	33.19	#NULL!	0	0	0	1386	4	1390	29.5	#NULL!	54	75	91	91	34	0	38	8
36	2	20.23	160.18	62.69	24.4	29.77	#NULL!	0	0	0	693	4	697	26.08	#NULL!	61	83	100	100	18	13	49	7
37	2	31.67	146.02	89.45	42	30.85	#NULL!	0	0	480	924	5	1409	24.93	#NULL!	46	100	66	66	18	6	52	9
38	2	24	157.95	81.19	32.5	35.04	6	1	0	0	396	5	401	42.2	#NULL!	57	67	66	66	100	9	50	5
39	2	29	158.89	87.33	34.6	30.81	7	2	0	0	693	5	698	36.28	#NULL!	64	54	100	100	56	15	41	6
40	2	31.57	153.37	83	35.3	33.65	#NULL!	0	0	0	924	4	928	23.69	#NULL!	54	67	100	100	36	1	46	5
41	2	35.91	161.06	71.32	27.5	33.14	#NULL!	0	0	360	2772	6	3138	42.8	#NULL!	68	79	100	100	4	12	53	7
42	2	31.37	167.85	63.69	22.6	31.05	#NULL!	0	0	0	924	6	930	35.69	#NULL!	79	33	41	41	12	0	42	3
43	2	29.07	185.63	61.66	19.9	39.43	4	2	0	784	924	5	1713	41.75	#NULL!	68	67	100	100	10	10	42	2
44	2	27.59	165.09	62.76	23	34.9	3	2	0	1080	2772	5	3857	39.56	#NULL!	21	50	50	50	84	3	53	9
45	2	23	166.09	73.84	26.8	26.92	#NULL!	0	0	1440	1386	5	2831	22.05	#NULL!	86	92	83	83	20	17	42	9
46	2	24.24	162.11	80.12	30.5	33.56	4	2	0	1440	1039	5	2484	25.28	#NULL!	39	96	75	75	12	8	44	5
47	2	26.31	155	79.15	32.9	31.01	#NULL!	0	0	0	594	6	600	40.97	#NULL!	36	63	50	50	2	2	53	2
48	2	38.46	162.68	87.41	33	35.56	#NULL!	0	0	320	0	4	324	39.32	#NULL!	21	25	50	50	36	13	52	11
49	2	32.75	163.72	75.2	28.1	30.62	#NULL!	0	0	240	396	4	640	31.75	#NULL!	82	58	58	58	20	1	50	2
50	2	26	192.56	96.8	26.1	32.66	4	2	0	480	792	5	1277	33.41	#NULL!	89	63	100	100	16	6	36	4
51	2	32.59	160.69	71.03	27.5	34.51	#NULL!	0	0	0	1386	4	1390	47.33	#NULL!	36	83	66	66	56	5	51	4
52	2	26.92	166.62	76	27.4	35.6	#NULL!	0	0	0	594	4	598	24.9	#NULL!	82	54	100	100	20	3	54	4
53	2	24.58	162.58	84.39	31.9	29.4	#NULL!	0	0	0	1386	4	1390	38.57	#NULL!	71	67	33	33	34	15	51	6
54	2	34.89	148.98	62.14	28	32	#NULL!	0	3360	0	1386	5	4751	29.57	#NULL!	50	71	66	66	32	4	53	3
55	2	38.25	176.71	58.94	18.9	31.58	#NULL!	0	0	80	1386	4	1470	29.39	#NULL!	29	46	83	83	40	5	43	4
56	2	37.45	172.02	82.24	27.8	31.04	#NULL!	0	360	3600	2772	4	6736	45.19	#NULL!	54	42	100	100	22	5	54	5
57	2	23.29	172.49	71.65	24.1	38.3	#NULL!	0	0	0	693	5	698	41.9	#NULL!	43	75	50	50	26	3	42	12
58	2	27.53	152.09	85.71	37.1	34.21	#NULL!	0	0	0	1386	5	1391	41.76	#NULL!	86	38	100	100	32	8	39	4
59	2	32.65	179.83	82.1	25.4	29.22	#NULL!	0	0	0	1386	4	1390	47.67	#NULL!	25	79	33	33	62	10	46	5
60	2	37.8	146.18	73.91	32.8	35.75	#NULL!	0	480	480	924	5	1889	32.25	#NULL!	54	67	66	66	8	1	33	7
61	2	26.17	170.04	62.3	21.5	39.37	#NULL!	0	0	0	1386	5	1391	40.18	#NULL!	61	100	8	8	54	7	46	9
62	2	28.51	189.29	52.28	18.1	36.1	#NULL!	0	0	32	132	5	169	28.28	#NULL!	54	83	66	66	16	2	27	4
63	2	25	151.11	68.3	29.9	28.44	#NULL!	0	0	0	1386	6	1392	35.89	#NULL!	43	21	100	100	14	1	51	7
64	2	24	156.2	87.85	36	31.55	#NULL!	0	0	0	1386	5	1391	30.44	#NULL!	82	42	83	83	12	3	34	3

## Sheet: Sayfa1
					PGQ	VAS_oturma	WHOQOL_fiziksel	WHOQOL_Psikolojik	WHOQOL_sosyal	WHOQOL_Çevre	Oswestry	Pittsburg	Normalized_work_EMG_yüzde	Normalized_rest_EMG_yüzde					çalışma	Kontrol
				1	65.27	7.5	18	50	91	78	84	20	28	10					18	14
	18.00			2	33.68	2.1	57	67	58	38	20	10	43	9					57	39
				3	52.1	6.63	36	83	83	66	50	12	30	10					36	54
				4	57.39	7.4	18	54	100	75	68	20	36	9					18	61
				5	30.17	4.27	57	42	50	41	34	6	32	11					57	68
				6	44.05	4.55	36	50	83	84	44	11	40	11					36	57
				7	7	1.2	71	58	33	78	14	2	50	4					71	64
				8	28.61	4.4	61	71	91	3	22	2	53	7					61	86
				9	40.96	4.8	57	50	100	97	50	0	27	10					57	46
				10	25.04	3.2	57	88	91	78	38	1	42	3					57	79
				11	71.12	7.5	18	54	83	50	84	20	33	6					18	39
				12	22.12	3.6	32	75	83	91	16	6	46	9					32	21
				13	37.96	1.65	36	21	50	91	38	1	34	10					36	86
				14	47.09	6.07	29	38	83	75	34	6	36	13					29	39
				15	68.06	7.3	18	83	91	50	50	13	27	3					18	36
				16	22.03	2.4	71	46	75	41	20	4	53	10					71	21
				17	63.61	4.71	32	83	75	41	88	4	29	9					32	82
				18	45.16	2.57	36	33	100	88	40	18	26	8					36	89
				19	29.3	2.88	71	33	16	53	28	3	48	2					71	36
				20	52.39	7.55	18	38	75	88	24	2	30	9					18	82
				21	48.18	6.53	36	38	16	84	22	17	36	8					36	71
				22	35.4	2.36	50	46	50	66	38	8	31	12					50	50
				23	46.12	5.6	36	79	58	78	42	7	28	7					36	61
				24	38.83	4.1	46	29	75	66	22	2	40	9					46	54
				25	46.82	6.9	43	58	91	53	28	9	31	4					43	43
				26	55.59	8.03	29	25	50	50	50	3	30	8					29	21
				27	70.38	7.14	21	63	66	72	74	14	30	10					21	25
				28	25.19	2.07	71	71	83	75	22	1	53	13					71	54
				29	79.13	6.9	7	38	100	75	88	21	25	12					7	29
				30	13.77	2.2	89	58	25	38	12	0	52	6					89	54
				31	42.57	4.88	39	88	83	94	54	3	27	10					39	43
				32	54.41	6.9	25	21	50	97	54	14	30	3					25	82
					PGQ	VAS_oturma	WHOQOL_fiziksel	WHOQOL_Psikolojik	WHOQOL_sosyal	WHOQOL_Çevre	Oswestry	Pittsburg	Normalized_work_EMG_yüzde	Normalized_rest_EMG_yüzde
				1	35.37	#NULL!	14	58	50	50	16	5	43	7			77		76934283
				2	24.53	#NULL!	39	67	100	100	4	8	29	6			64
				3	29.5	#NULL!	54	75	91	91	34	0	38	8			80		64234714
				4	26.08	#NULL!	61	83	100	100	18	13	49	7			97
				5	24.93	#NULL!	68	100	66	66	18	6	52	9			62		79953771
				6	42.2	#NULL!	57	67	66	66	100	9	50	5			62
				7	36.28	#NULL!	64	54	100	100	56	15	41	6			99		97460597
				8	23.69	#NULL!	86	67	100	100	2	1	46	5			82
				9	42.8	#NULL!	46	79	100	100	42	12	53	7			58		62316933
				10	35.69	#NULL!	79	33	41	41	12	0	42	3			78
				11	41.75	#NULL!	39	67	100	100	10	10	42	2			58		62317261
				12	39.56	#NULL!	21	50	50	50	22	3	53	9			58
				13	22.05	#NULL!	86	92	83	83	20	17	42	9			72		98584256
				14	25.28	#NULL!	39	96	75	75	12	8	44	5			29
				15	40.97	#NULL!	36	63	50	50	36	2	53	2			33		82348695
				16	39.32	#NULL!	21	25	50	50	36	13	52	11			56
				17	31.75	#NULL!	82	58	58	58	20	1	50	2			47		57610512
				18	33.41	#NULL!	89	63	100	100	16	6	36	4			73
				19	47.33	#NULL!	36	83	66	66	56	5	51	4			49		77851201
				20	24.9	#NULL!	82	54	100	100	20	3	54	4			39
				21	38.57	#NULL!	71	67	33	33	34	15	51	6			96		57731646
				22	29.57	#NULL!	50	71	66	66	32	4	53	3			62
				23	29.39	#NULL!	61	46	83	83	40	5	43	4			68		57685405
				24	45.19	#NULL!	54	42	100	100	84	5	54	5			39
				25	41.9	#NULL!	43	75	50	50	26	3	42	12			56		71839245
				26	41.76	#NULL!	21	38	100	100	32	8	39	4			69
				27	47.67	#NULL!	25	79	33	33	62	10	46	5			44		28734395
				28	32.25	#NULL!	54	67	66	66	8	1	33	7			75
				29	40.18	#NULL!	29	100	8	8	54	7	46	9			55		32501643
				30	28.28	#NULL!	54	83	66	66	16	2	27	4			61
				31	35.89	#NULL!	43	21	100	100	14	1	51	7			55		55754249
				32	30.44	#NULL!	82	42	83	83	12	3	34	3			100
																			46743378
																			73284947
																			48839518
					Variable	Normal_Distribution													38753926
					Hasta_no	False
					Grup	False													96312975
					yaş	False
					boy	True													62484474
					kilo	True
					BMI	False													68350564
					gebelik_haftası	True
					sigara_paket_yıl	False													38505036
					sigara_kullanımı	False
					IPAQ_şiddetli	False													56112346
					IPAQ_orta	False
					IPAQ_yürüme	False													69218452
					IPAQ_oturma	False
					IPAQ_Toplam	False													43980128
					PGQ	True
					VAS_oturma	True													74513960
					WHOQOL_fiziksel	True
					WHOQOL_Psikolojik	True													54987226
					WHOQOL_sosyal	False
					WHOQOL_Çevre	False													61166125
					Oswestry	False
					Pittsburg	False													54965868
					Normalized_work_EMG_yüzde	False
					Normalized_rest_EMG_yüzde	False													100000000

## Sheet: Sayfa2
		Correlations
		Grup			PGQ	VAS_oturma	WHOQOL_fiziksel	WHOQOL_Psikolojik	WHOQOL_sosyal	WHOQOL_Çevre	Oswestry	Pittsburg	Normalized_work_EMG_yüzde	Normalized_rest_EMG_yüzde
		Çalışma	PGQ	Pearson Correlation	1	.823**	-.882**	-.080	.381*	.126	.841**	.539**	-.772**	.125
				Sig. (2-tailed)		.000	.000	.665	.032	.491	.000	.001	.000	.495
				N	32	32	32	32	32	32	32	32	32	32
			VAS_oturma	Pearson Correlation	.823**	1	-.785**	-.050	.305	.091	.590**	.397*	-.623**	-.028
				Sig. (2-tailed)	.000		.000	.787	.089	.621	.000	.024	.000	.877
				N	32	32	32	32	32	32	32	32	32	32
			WHOQOL_fiziksel	Pearson Correlation	-.882**	-.785**	1	.112	-.419*	-.361*	-.694**	-.420*	.746**	-.158
				Sig. (2-tailed)	.000	.000		.542	.017	.043	.000	.017	.000	.387
				N	32	32	32	32	32	32	32	32	32	32
			WHOQOL_Psikolojik	Pearson Correlation	-.080	-.050	.112	1	.318	-.189	.070	-.031	.097	-.094
				Sig. (2-tailed)	.665	.787	.542		.076	.301	.703	.866	.596	.610
				N	32	32	32	32	32	32	32	32	32	32
			WHOQOL_sosyal	Pearson Correlation	.381*	.305	-.419*	.318	1	.114	.404*	.161	-.298	.278
				Sig. (2-tailed)	.032	.089	.017	.076		.535	.022	.377	.098	.124
				N	32	32	32	32	32	32	32	32	32	32
			WHOQOL_Çevre	Pearson Correlation	.126	.091	-.361*	-.189	.114	1	.123	.014	-.387*	.163
				Sig. (2-tailed)	.491	.621	.043	.301	.535		.503	.940	.029	.373
				N	32	32	32	32	32	32	32	32	32	32
			Oswestry	Pearson Correlation	.841**	.590**	-.694**	.070	.404*	.123	1	.447*	-.665**	.148
				Sig. (2-tailed)	.000	.000	.000	.703	.022	.503		.010	.000	.419
				N	32	32	32	32	32	32	32	32	32	32
			Pittsburg	Pearson Correlation	.539**	.397*	-.420*	-.031	.161	.014	.447*	1	-.354*	-.032
				Sig. (2-tailed)	.001	.024	.017	.866	.377	.940	.010		.047	.862
				N	32	32	32	32	32	32	32	32	32	32
			Normalized_work_EMG_yüzde	Pearson Correlation	-.772**	-.623**	.746**	.097	-.298	-.387*	-.665**	-.354*	1	-.136
				Sig. (2-tailed)	.000	.000	.000	.596	.098	.029	.000	.047		.459
				N	32	32	32	32	32	32	32	32	32	32
			Normalized_rest_EMG_yüzde	Pearson Correlation	.125	-.028	-.158	-.094	.278	.163	.148	-.032	-.136	1
				Sig. (2-tailed)	.495	.877	.387	.610	.124	.373	.419	.862	.459
				N	PGQ	VAS_oturma	WHOQOL_fiziksel	WHOQOL_Psikolojik	WHOQOL_sosyal	WHOQOL_Çevre	Oswestry	Pittsburg	Normalized_work_EMG_yüzde	Normalized_rest_EMG_yüzde
		Kontrol	PGQ	Pearson Correlation	1	.c	-.543**	-.217	-.339	-.339	.629**	.217	.313	-.004
				Sig. (2-tailed)		.	.001	.234	.057	.057	.000	.233	.081	.982
				N	32	0	32	32	32	32	32	32	32	32
			VAS_oturma	Pearson Correlation	.c	.c	.c	.c	.c	.c	.c	.c	.c	.c
				Sig. (2-tailed)	.		.	.	.	.	.	.	.	.
				N	0	0	0	0	0	0	0	0	0	0
			WHOQOL_fiziksel	Pearson Correlation	-.543**	.c	1	.031	.315	.315	-.216	-.336	-.104	-.276
				Sig. (2-tailed)	.001	.		.866	.079	.079	.235	.060	.570	.126
				N	32	0	32	32	32	32	32	32	32	32
			WHOQOL_Psikolojik	Pearson Correlation	-.217	.c	.031	1	-.196	-.196	.019	.208	-.070	.182
				Sig. (2-tailed)	.234	.	.866		.283	.283	.918	.253	.703	.318
				N	32	0	32	32	32	32	32	32	32	32
			WHOQOL_sosyal	Pearson Correlation	-.339	.c	.315	-.196	1	1.000**	-.184	.108	-.171	-.221
				Sig. (2-tailed)	.057	.	.079	.283		.000	.313	.556	.348	.224
				N	32	0	32	32	32	32	32	32	32	32
			WHOQOL_Çevre	Pearson Correlation	-.339	.c	.315	-.196	1.000**	1	-.184	.108	-.171	-.221
				Sig. (2-tailed)	.057	.	.079	.283	.000		.313	.556	.348	.224
				N	32	0	32	32	32	32	32	32	32	32
			Oswestry	Pearson Correlation	.629**	.c	-.216	.019	-.184	-.184	1	.298	.397*	.018
				Sig. (2-tailed)	.000	.	.235	.918	.313	.313		.098	.024	.922
				N	32	0	32	32	32	32	32	32	32	32
			Pittsburg	Pearson Correlation	.217	.c	-.336	.208	.108	.108	.298	1	.158	.212
				Sig. (2-tailed)	.233	.	.060	.253	.556	.556	.098		.387	.244
				N	32	0	32	32	32	32	32	32	32	32
			Normalized_work_EMG_yüzde	Pearson Correlation	.313	.c	-.104	-.070	-.171	-.171	.397*	.158	1	.080
				Sig. (2-tailed)	.081	.	.570	.703	.348	.348	.024	.387		.662
				N	32	0	32	32	32	32	32	32	32	32
			Normalized_rest_EMG_yüzde	Pearson Correlation	-.004	.c	-.276	.182	-.221	-.221	.018	.212	.080	1
				Sig. (2-tailed)	.982	.	.126	.318	.224	.224	.922	.244	.662
				N	32	0	32	32	32	32	32	32	32	32
		** Correlation is significant at the 0.01 level (2-tailed).
		* Correlation is significant at the 0.05 level (2-tailed).
		c Cannot be computed because at least one of the variables is constant.
